# Supplementary material
Source: Springer Nature journal article supplement (https://www.springermedizin.de/resource/supplementary/12902_2013_201_MOESM2_ESM.pdf/9515744)

**ATPIII**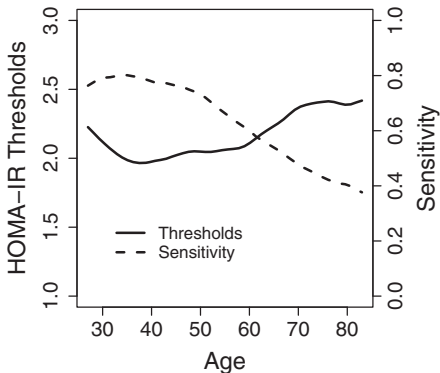**IDF**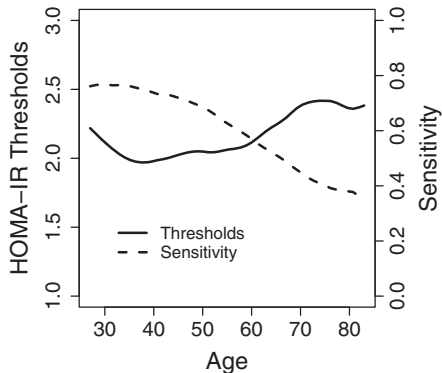**ATPIII**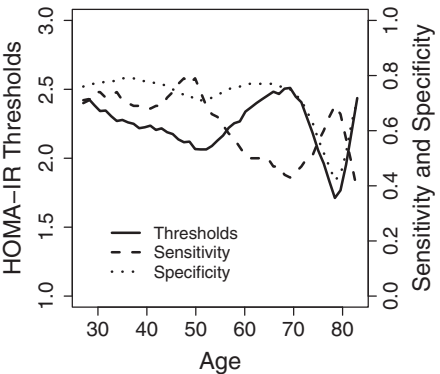**IDF**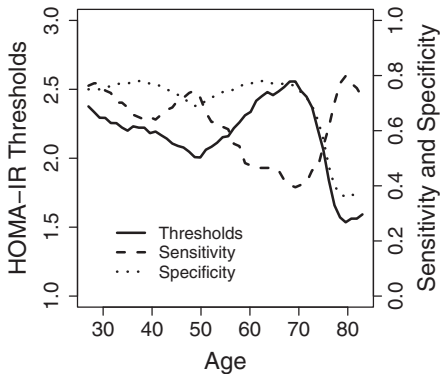

Supplement: MOESM2 [file 9515744]
